# Supplementary material for: Bacterial co-culture with cell signaling translator and growth controller modules for autonomously regulated culture composition
Source: PubMed Central journal article supplement (PMC6739400; doi:10.1038/s41467-019-12027-6), 2019-09-11
Supplement: 41467_2019_12027_MOESM4_ESM.pdf [file 41467_2019_12027_MOESM4_ESM.pdf]

## **Description of Additional Supplementary Files**

**Title:** Supplementary Software 1

**Description:** containing MATLAB code for batch model

**Title:** Supplementary Software 2

**Description:** containing MATLAB code for extended batch model
